# Supplementary material for: Preparation of aqueous sol–gel silica and titania multi-layered thin films and their evaluation as biomolecular encapsulation hosts
Source: Royal Society of Chemistry journal article supplement (doi:10.1039/c2tb00417h), 2012-12-13
Supplement: c2tb00417h.pdf [file c2tb00417h.pdf]

# **Preparation of aqueous sol-gel silica and titania multi-layered thin films and their evaluation as biomolecular encapsulation hosts**

**T. Moreau et al.**

## *Electronic Supplementary Information*

**ESI-1.** ADECA and A<sub>2</sub>HRP blank experiments using antibody-free silica and titania films

**ESI-2.** HRP immobilization in a TiO<sub>2</sub> single layer (TiBALDH = 0.042 M) before and after washing

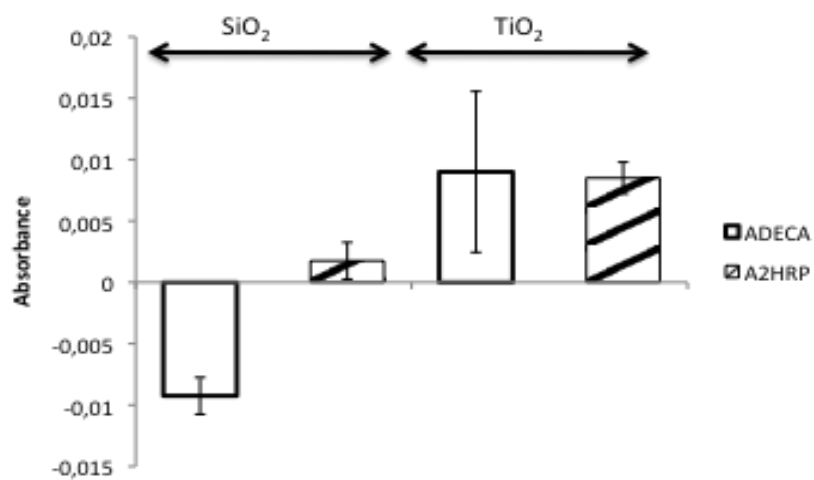

**ESI-1.** ADECA and A<sub>2</sub>HRP blank experiments using antibody-free silica and titania films

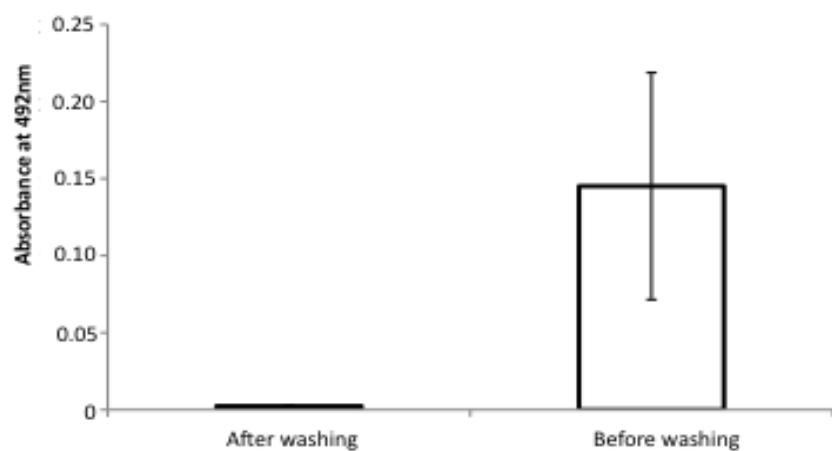

**ESI-2.** HRP immobilization in a TiO<sub>2</sub> single layer (TiBALDH = 0.042 M) before and after washing
